# Supplementary material for: Pyrosequencing-based analysis reveals a novel capsular gene cluster in a KPC-producing Klebsiella pneumoniae clinical isolate identified in Brazil
Source: PubMed Central journal article supplement (PMC3438125; doi:10.1186/1471-2180-12-173), 2012-08-11

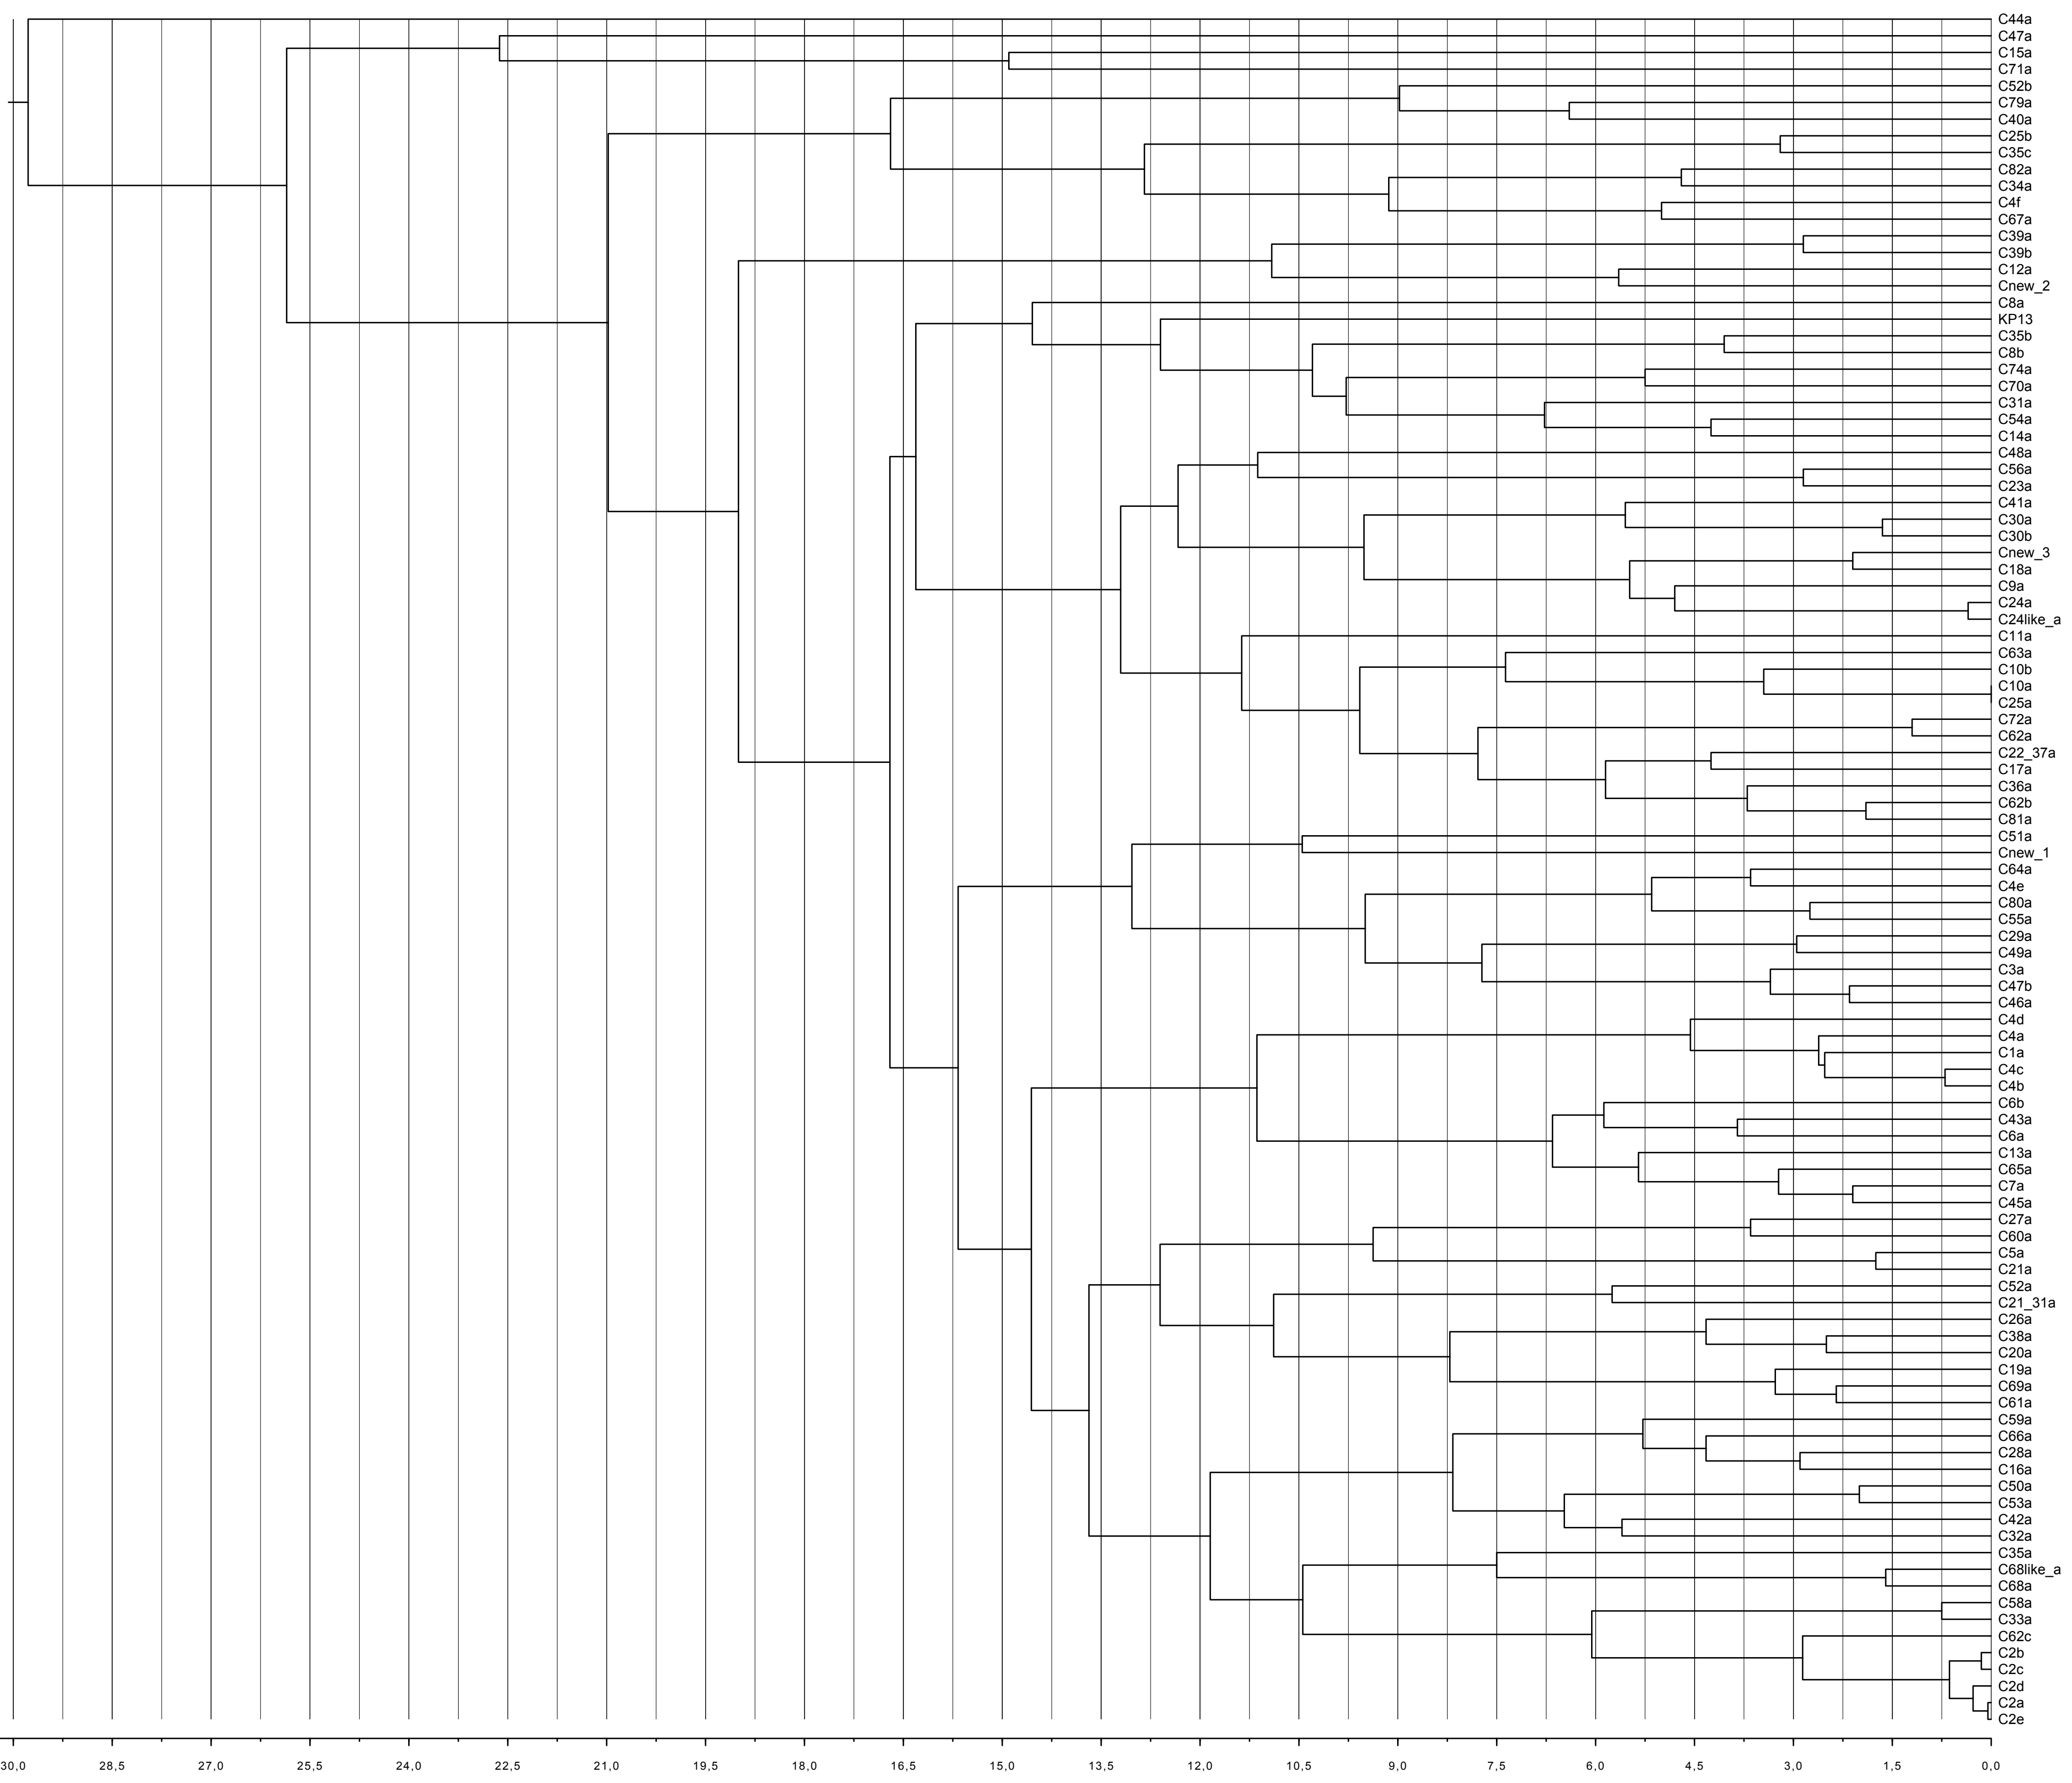

Supplement: 1471-2180-12-173-S1.pdf [file 1471-2180-12-173-S1.pdf]
